# Supplementary material for: The progression of lipid oxidation, β-carotenes degradation and sensory perception of batch-fried sliced sweet potato crisps during storage
Source: Royal Society of Chemistry journal article supplement (doi:10.1039/d0fo03100c), 2021-01-01
Supplement: d0fo03100c1.pdf [file d0fo03100c1.pdf]

## 1 Supporting information

### 2 Supplemental Figures

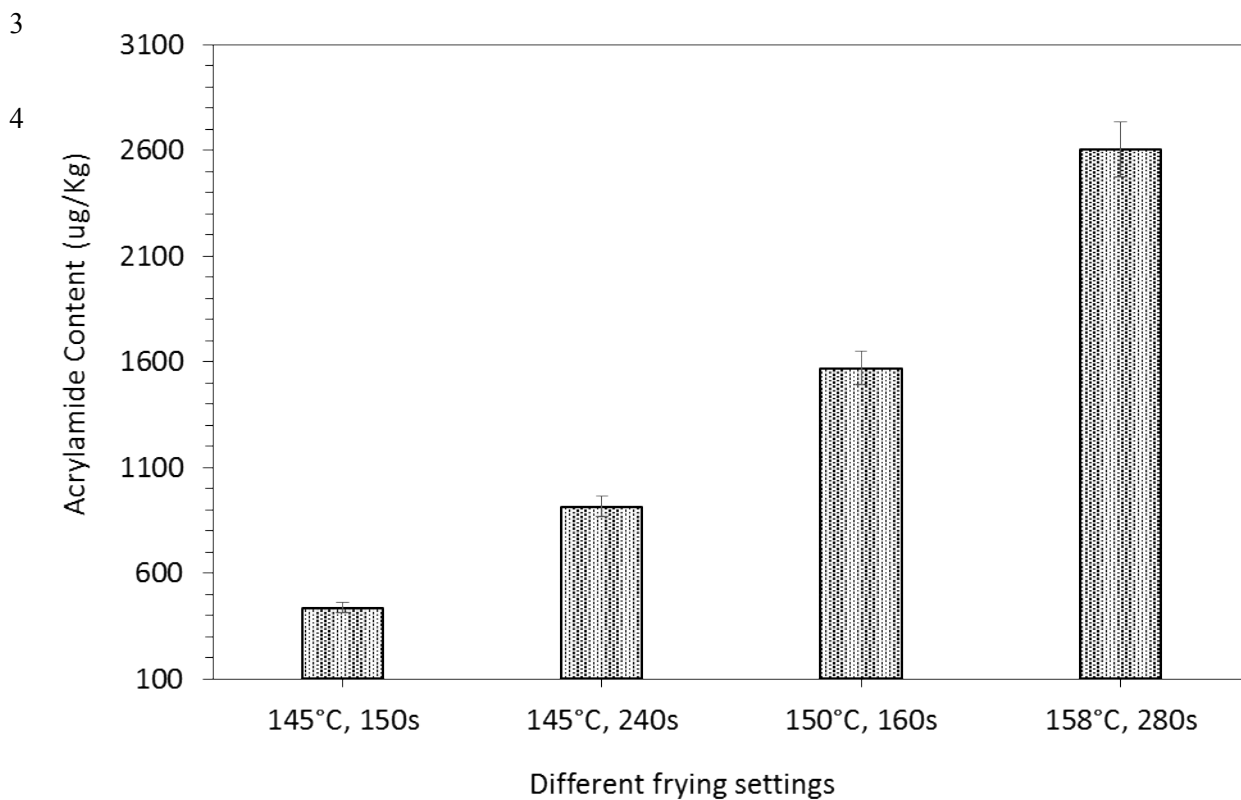

5

6

7 **Figure S1:** Acrylamide content in sweet potato crisps fried in HOSO at different frying settings.
